# Supplementary material for: Systematic Review and Meta-Analysis of the Magnitude of Structural, Clinical, and Physician and Patient Barriers to Cancer Clinical Trial Participation
Source: PubMed Central journal article supplement — J Natl Cancer Inst. 2019 Feb 19;111(3):245–55. doi: 10.1093/jnci/djy221 (PMC6410951; doi:10.1093/jnci/djy221), 2019-02-19
Supplement: djy221_supp.pdf [file djy221_supp.pdf]

**SUPPLEMENTARY MATERIALS**

**Systematic Review and Meta-Analysis of the Magnitude of Structural, Clinical, and Physician/Patient Barriers to Cancer Clinical Trial Participation**

Joseph M. Unger, Ph.D., Riha Vaidya, Ph.D., Dawn L. Hershman, M.D., Lori M. Minasian, M.D., Mark Fleury, Ph.D.

**Table of Contents**

**Supplementary Table 1** Literature search strategy.....2

**Supplementary Table 2** List of articles assessed for inclusion in the analysis but excluded.....3

**Supplementary Table 3** Definitions of trial availability for included studies.....5

**Supplementary References** .....6

**Supplementary Table 1: Literature search strategy**

| <b>Specified Steps in Search Algorithm</b>            | <b>Step Characteristics</b>                                                                                                                                                                                                                                    |
|-------------------------------------------------------|----------------------------------------------------------------------------------------------------------------------------------------------------------------------------------------------------------------------------------------------------------------|
| Databases Searched                                    | PubMed<br>Google Scholar<br>Web of Science<br>Ovid-Medline                                                                                                                                                                                                     |
| Search Keywords                                       | ("clinical trial accrual" OR "clinical trial enrollment"<br>OR "clinical trial enrollment barriers" OR "enrollment<br>in clinical trials" OR "patient participation in clinical<br>trials") AND cancer                                                         |
| Date Range Used                                       | PubMed: January 1, 1999 – December 31, 2017<br>Google Scholar: 1999 – 2017<br>Web of Science: 1999 – 2017<br>Ovid-Medline: 1999 – 2017                                                                                                                         |
| No. of Results Returned                               | Total (n = 9,675) <ul style="list-style-type: none"> <li>▪ PubMed (n = 1,920)</li> <li>▪ Google Scholar (n = 6,060)</li> <li>▪ Web of Science (n = 389)</li> <li>▪ Ovid-Medline (n = 1,306; 1,648 results<br/>returned of which n = 342 duplicates)</li> </ul> |
| Results Included in 2 or More Databases               | n = 2,099                                                                                                                                                                                                                                                      |
| Titles and/or Abstracts Screened                      | n = 7,576                                                                                                                                                                                                                                                      |
| Non-relevant Results (Other Topics)                   | n = 7,538                                                                                                                                                                                                                                                      |
| Full Papers Reviewed (Including Published Abstracts)  | n = 38                                                                                                                                                                                                                                                         |
| Articles and Abstracts Not Meeting Inclusion Criteria | n = 25                                                                                                                                                                                                                                                         |
| Included in Final Analysis                            | n = 13                                                                                                                                                                                                                                                         |

**Supplementary Table 2:** List of articles assessed for inclusion in the analysis but excluded

| <b>Lead Author, Year</b>         | <b>Article Title</b>                                                                                                                                                | <b>Reason for Exclusion</b>                                                                                         |
|----------------------------------|---------------------------------------------------------------------------------------------------------------------------------------------------------------------|---------------------------------------------------------------------------------------------------------------------|
| Simon, et al., 1999 (1)          | Accrual to breast cancer clinical trials at a university-affiliated hospital in metropolitan Detroit                                                                | Article has data inconsistencies.                                                                                   |
| Adams-Campbell, et al., 2004 (2) | Enrollment of African Americans onto clinical treatment trials: study design barriers                                                                               | Article has data inconsistencies.                                                                                   |
| Simon, et al., 2004 (3)          | Factors associated with breast cancer clinical trials participation and enrollment at a Large academic medical center                                               | Study does not assess actual eligibility – it only examines perceived eligibility.                                  |
| Avis, et al., 2006 (4)           | Factors associated with participation in breast cancer treatment clinical trials                                                                                    | Study examines enrollment decisions only among patients with available trials.                                      |
| Baggstrom, et al., 2006 (5)      | Barriers for accrual to clinical trials in adult patients (pts) with thoracic malignancies                                                                          | Data are not complete to examine the full decision process.                                                         |
| Du, et al., 2008 (6)             | An educational video to increase clinical trials enrollment among lung cancer patients                                                                              | Study examines only the enrollment rate.                                                                            |
| Grubbs, et al., 2009 (7)         | Tracking clinical trial accrual strategies and barriers via a Web-based screening tool                                                                              | Study does not assess trial availability as it examines screening logs of specific trials.                          |
| Sorbye, et al., 2009 (8)         | Clinical trial enrollment, patient characteristics, and survival differences in prospectively registered metastatic colorectal cancer patients                      | Study is conducted in a non-US setting.                                                                             |
| Kuroki, et al., 2010 (9)         | Addressing clinical trials: Can the Multidisciplinary Tumor Board improve participation? A study from an academic women's cancer program                            | Study does not provide data on trial availability.                                                                  |
| Wujcik, et al., 2010 (10)        | Recruitment of African Americans to national oncology clinical trials through a clinical trial shared resource                                                      | Article has data inconsistencies.                                                                                   |
| Biedrzycki, 2011 (11)            | Factors and outcomes of decision making for cancer clinical trial participation                                                                                     | Study examines factors influencing enrollment and non-enrollment.                                                   |
| Dechartres, et al., 2011 (12)    | Inclusion of patients with acute leukemia in clinical trials: a prospective multicenter survey of 1066 cases                                                        | Study is conducted in a non-US setting.                                                                             |
| Proctor, et al., 2011 (13)       | A screening tool to enhance clinical trial participation at a community center involved in a radiation oncology disparities program                                 | Study is not representative since it focuses only on trials for external beam radiation therapy.                    |
| Virani, et al., 2011 (14)        | Barriers to recruitment of rural patients in cancer clinical trials                                                                                                 | Study examines trial awareness and willingness to participate.                                                      |
| Fouad, et al., 2012 (15)         | Enrollment of patients with lung and colorectal cancers onto clinical trials                                                                                        | Study examines final enrollment decision only.                                                                      |
| Holmes, et al., 2012 (16)        | Increasing minority patient participation in cancer clinical trials using oncology nurse navigation                                                                 | Study is not representative of the general population of cancer patients, including only African American patients. |
| Penberthy, et al., 2012 (17)     | Barriers to therapeutic clinical trials enrollment: Differences between African-American and White cancer patients identified at the time of eligibility assessment | Study only examines patterns among patients with available trials                                                   |
| Anwuri, et al., 2013 (18)        | An institutional strategy to increase minority recruitment to therapeutic trials                                                                                    | Study examines only the final accrual rate.                                                                         |

|                               |                                                                                                                                          |                                                                                                 |
|-------------------------------|------------------------------------------------------------------------------------------------------------------------------------------|-------------------------------------------------------------------------------------------------|
| Byrne, et al., 2013 (19)      | Participation in cancer clinical trials: why are patients not participating?                                                             | Study is a survey of willingness to participate in trials.                                      |
| Behrendt, et al., 2014 (20)   | Socioeconomic and clinical factors are key to uncovering disparity in accrual onto therapeutic trials for breast cancer                  | Study examines only enrollment rate and associated demographic factors.                         |
| St Germain, et al., 2014 (21) | Use of the National Cancer Institute Community Cancer Centers Program screening and accrual log to address cancer clinical trial accrual | Study does not assess trial availability as it examines patients screened for available trials. |
| Ko, et al., 2015 (22)         | Cancer clinical trial enrollment of diverse and underserved patients within an urban safety net hospital                                 | Analysis conducted on 'screening notes' where a patient may have multiple notes.                |
| Fouad, et al., 2016 (23)      | Patient navigation as a model to increase participation of African Americans in cancer clinical trials                                   | Study examines enrollment patterns only among patients with available trials.                   |
| Greenwade, et al., 2017 (24)  | Factors influencing clinical trial enrollment among ovarian cancer patients                                                              | Study examines enrollment patterns only among patients with available trials.                   |
| Ibrahim, et al., 2017 (25)    | Representation of minorities and elderly in cancer clinical trials at a single institution -the William Beaumont Hospital experience     | Study examines only the enrollment rate.                                                        |

---

**Supplementary Table 3:** Definitions of trial availability for included studies.

| <b>Study</b>                      | <b>Definition</b>                      | <b>Clear specification that trial availability determined by cancer site and stage: Notes</b>                                                                                                                |
|-----------------------------------|----------------------------------------|--------------------------------------------------------------------------------------------------------------------------------------------------------------------------------------------------------------|
| Lara, et al., 2001 (26)           | Site and stage                         | Yes: Noted in Abstract. "53% (91/171) had an appropriate protocol available for site and stage of disease."                                                                                                  |
| Martel, et al., 2004 (27)         | Site and stage                         | Yes: Noted in Methods: "The second question inquired about the availability of an appropriate protocol for the site and stage of the patient's disease."                                                     |
| Umutyan, et al., 2008 (28)        | Site and stage                         | Yes: Noted in results: "Protocols appropriate for site and stage available at the time of the survey".                                                                                                       |
| Baggstrom, et al., 2010 (29)      | Histologic subtype and stage           | Yes: Noted in Methods: "Appropriate studies at the time of initial consultation were noted ... based on the histologic subtype and staging before a formal individualized eligibility review was conducted." |
| Javid, et al., 2012 (30)          | Disease site and stage                 | Yes: Noted in Methods: "a therapeutic clinical trial available for the patient's disease site and stage".                                                                                                    |
| Kanarek, et al., 2012 (31)        | Cancer site and stage or patient class | Indeterminate: Noted in Methods as, "appropriate to the patient's condition", which they further indicate can include either "cancer site and stage" or "patient class"                                      |
| Horn, et al., 2013 (32)           | Diagnosis and stage                    | Yes: Noted in Methods: "was a therapeutic protocol available given a patient's diagnosis and stage?"                                                                                                         |
| Swain-Cabrales, et al., 2013 (33) | Histologic subtype and stage           | Yes: Defined as: "Appropriate studies at the time of initial consultation were obtained ... based on the histologic subtype and staging."                                                                    |
| Brooks, et al., 2015 (34)         | Tumor type and stage                   | Yes: Noted in title to Table 3: "Trial availability percentage by stage of disease and by tumor type."                                                                                                       |
| Klabunde, et al., 1999 (35)       | Cancer site and stage                  | Yes: In Methods, notes whether a "protocol was available for the patients cancer type". The Discussion clarifies, "a protocol matching their cancer site and stage was not available"                        |
| Guarino, et al., 2005 (36)        | Active, available trial                | No: Indicated as: "no active trial" or "lack of available trial"... no clear definition                                                                                                                      |
| Go, et al., 2006 (37)             | Diagnosis and stage of cancer          | Yes: Noted in Abstract: "appropriate for the diagnosis and stage of disease were not available"                                                                                                              |
| Guadagnolo, et al., 2009 (38)     | Cancer site and stage                  | Yes: Methods notes that primary data collection included "cancer site with stage at presentation"                                                                                                            |

## Supplementary References

1. Simon MS, Brown DR, Du W, LoRusso P, Kellogg CM. Accrual to breast cancer clinical trials at a university-affiliated hospital in metropolitan Detroit. *Am J Clin Oncol*. 1999 Feb;22(1):42-6.
2. Adams-Campbell LL, Ahaghotu C, Gaskins M, Dawkins FW, Smoot D, Polk OD, Gooding R, DeWitty RL. Enrollment of African Americans onto clinical treatment trials: study design barriers. *J Clin Oncol*. 2004 Feb 15;22(4):730-4.
3. Simon MS, Du W, Flaherty L, Philip PA, Lorusso P, Miree C, Smith D, Brown DR. Factors associated with breast cancer clinical trials participation and enrollment at a large academic medical center. *J Clin Oncol*. 2004 Jun 1;22(11):2046-52. Epub 2004 Apr 13.
4. Avis NE, Smith KW, Link CL, Hortobagyi GN, Rivera E. Factors associated with participation in breast cancer treatment clinical trials. *J Clin Oncol*. 2006 Apr 20;24(12):1860-7.
5. Baggstrom MQ, Gilstrap E, Skelton A, Viswanathan A, Morgensztern D, Nations PA, Foersterling D, Govindan R. Barriers for accrual to clinical trials in adult patients (pts) with thoracic malignancies. *Journal of Clinical Oncology* 2006 24:18\_suppl, 6058-6058
6. Du W, Mood D, Gadgeel S, Simon MS. An educational video to increase clinical trials enrollment among lung cancer patients. *J Thorac Oncol*. 2008 Jan;3(1):23-9. doi: 10.1097/JTO.0b013e31815e8bb2.
7. Grubbs SS, Gonzalez M, Krasna M, Siegel R, Bryant D, Tschetter L, Hayenga L, Duggan B, St. Germaine D, Denicoff A. Tracking clinical trial accrual strategies and barriers via a Web-based screening tool. *Journal of Clinical Oncology* 2009 27:15S, 6586-6586
8. Sorbye H, Pfeiffer P, Cavalli-Björkman N, Qvortrup C, Holsen MH, Wentzel-Larsen T, Glimelius B. Clinical trial enrollment, patient characteristics, and survival differences in prospectively registered metastatic colorectal cancer patients. *Cancer*. 2009 Oct 15;115(20):4679-87. doi: 10.1002/cncr.24527.
9. Kuroki L, Stuckey A, Hirway P, Raker CA, Bandera CA, DiSilvestro PA, Granai CO, Legare RD, Sakr BJ, Dizon DS. Addressing clinical trials: can the multidisciplinary Tumor Board improve participation? A study from an academic women's cancer program. *Gynecol Oncol*. 2010 Mar;116(3):295-300. doi: 10.1016/j.ygyno.2009.12.005. Epub 2009 Dec 29.
10. Wujcik D, Wolff SN. Recruitment of African Americans to National Oncology Clinical Trials through a clinical trial shared resource. *J Health Care Poor Underserved*. 2010 Feb;21(1 Suppl):38-50. doi: 10.1353/hpu.0.0251.
11. Biedrzycki BA. Factors and outcomes of decision making for cancer clinical trial participation. *Oncol Nurs Forum*. 2011 Sep;38(5):542-52. doi: 10.1188/11.ONF.542-552.
12. Dechartres A, Chevret S, Lambert J, Calvo F, Lévy V. Inclusion of patients with acute leukemia in clinical trials: a prospective multicenter survey of 1066 cases. *Ann Oncol*. 2011 Jan;22(1):224-33. doi: 10.1093/annonc/mdq336. Epub 2010 Jul 13.
13. Proctor JW, Martz E, Schenken LL, Rainville R, Marlowe U. A screening tool to enhance clinical trial participation at a community center involved in a radiation oncology disparities program. *J Oncol Pract*. 2011 May;7(3):161-4. doi: 10.1200/JOP.2010.000135.
14. Virani S, Burke L, Remick SC, Abraham J. Barriers to recruitment of rural patients in cancer clinical trials. *J Oncol Pract*. 2011 May;7(3):172-7. doi: 10.1200/JOP.2010.000158.
15. Fouad MN, Lee JY, Catalano PJ, Vogt TM, Zafar SY, West DW, Simon C, Klabunde CN, Kahn KL, Weeks JC, Kiefe CI. Enrollment of patients with lung and colorectal cancers onto clinical trials. *J Oncol Pract*. 2013 Mar;9(2):e40-7. doi: 10.1200/JOP.2012.000598.
16. Holmes DR, Major J, Lyonga DE, Alleyne RS, Clayton SM. Increasing minority patient participation in cancer clinical trials using oncology nurse navigation. *Am J Surg*. 2012 Apr;203(4):415-22. doi: 10.1016/j.amjsurg.2011.02.005. Epub 2011 Oct 13.
17. Penberthy L, Brown R, Wilson-Genderson M, Dahman B, Ginder G, Siminoff LA. Barriers to therapeutic clinical trials enrollment: differences between African-American and white cancer patients identified at the time of eligibility assessment. *Clin Trials*. 2012 Dec;9(6):788-97. doi: 10.1177/1740774512458992. Epub 2012 Oct 2.
18. Anwuri VV, Hall LE, Mathews K, Springer BC, Tappenden JR, Farria DM, Jackson S, Goodman MS, Eberlein TJ, Colditz GA. An institutional strategy to increase minority recruitment to therapeutic trials. *Cancer Causes Control*. 2013 Oct;24(10):1797-809. doi: 10.1007/s10552-013-0258-1. Epub 2013 Jul 12.
19. Byrne MM, Tannenbaum SL, Glück S, Hurley J, Antoni M. Participation in cancer clinical trials: why are patients not participating? *Med Decis Making*. 2014 Jan;34(1):116-26. doi: 10.1177/0272989X13497264. Epub 2013 Jul 29.
